# Supplementary material
Source: publisher figshare collection journal article supplement (https://future-science-group.figshare.com/ndownloader/files/28220748)
Supplement: Supplementary file 1 [file 28220748]

**Supplementary Table 1. Primary diagnoses of interest.**

| **ICD-9/10 diagnosis code** | **Diagnosis description** |
| --- | --- |
| 174 | MALIGNANT NEOPLASM OF FEMALE BREAST |
| 174.0 | MALIGNANT NEOPLASM OF NIPPLE AND AREOLA OF FEMALE BREAST |
| 174.1 | MALIGNANT NEOPLASM OF CENTRAL PORTION OF FEMALE BREAST |
| 174.2 | MALIGNANT NEOPLASM OF UPPER-INNER QUADRANT OF FEMALE BREAST |
| 174.3 | MALIGNANT NEOPLASM OF LOWER-INNER QUADRANT OF FEMALE BREAST |
| 174.4 | MALIGNANT NEOPLASM OF UPPER-OUTER QUADRANT OF FEMALE BREAST |
| 174.5 | MALIGNANT NEOPLASM OF LOWER-OUTER QUADRANT OF FEMALE BREAST |
| 174.6 | MALIGNANT NEOPLASM OF AXILLARY TAIL OF FEMALE BREAST |
| 174.8 | MALIGNANT NEOPLASM OF OTHER SPECIFIED SITES OF FEMALE BREAST |
| 174.9 | MALIGNANT NEOPLASM OF BREAST (FEMALE), UNSPECIFIED SITE |
| 175 | MALIGNANT NEOPLASM OF MALE BREAST |
| 175.0 | MALIGNANT NEOPLASM OF NIPPLE AND AREOLA OF MALE BREAST |
| 175.9 | MALIGNANT NEOPLASM OF OTHER AND UNSPECIFIED SITES OF MALE BREAST |
| 196.0 | SECONDARY AND UNSPECIFIED MALIGNANT NEOPLASM OF LYMPH NODES OF HEAD, FACE, AND NECK |
| 196.1 | SECONDARY AND UNSPECIFIED MALIGNANT NEOPLASM OF INTRATHORACIC LYMPH NODES |
| 196.2 | SECONDARY AND UNSPECIFIED MALIGNANT NEOPLASM OF INTRA-ABDOMINAL LYMPH NODES |
| 196.3 | SECONDARY AND UNSPECIFIED MALIGNANT NEOPLASM OF LYMPH NODES OF AXILLA AND UPPER LIMB |
| 196.5 | SECONDARY AND UNSPECIFIED MALIGNANT NEOPLASM OF LYMPH NODES OF INGUINAL REGION AND LOWER LIMB |
| 196.6 | SECONDARY AND UNSPECIFIED MALIGNANT NEOPLASM OF INTRAPELVIC LYMPH NODES |
| 196.8 | SECONDARY AND UNSPECIFIED MALIGNANT NEOPLASM OF LYMPH NODES OF MULTIPLE SITES |
| 196.9 | SECONDARY AND UNSPECIFIED MALIGNANT NEOPLASM OF LYMPH NODES, SITE UNSPECIFIED |
| 197 | SECONDARY MALIGNANT NEOPLASM OF RESPIRATORY AND DIGESTIVE SYSTEMS |
| 197.0 | SECONDARY MALIGNANT NEOPLASM OF LUNG |
| 197.1 | SECONDARY MALIGNANT NEOPLASM OF MEDIASTINUM |
| 197.2 | SECONDARY MALIGNANT NEOPLASM OF PLEURA |
| 197.3 | SECONDARY MALIGNANT NEOPLASM OF OTHER RESPIRATORY ORGANS |
| 197.4 | SECONDARY MALIGNANT NEOPLASM OF SMALL INTESTINE INCLUDING DUODENUM |
| 197.5 | SECONDARY MALIGNANT NEOPLASM OF LARGE INTESTINE AND RECTUM |
| 197.6 | SECONDARY MALIGNANT NEOPLASM OF RETROPERITONEUM AND PERITONEUM |
| 197.7 | MALIGNANT NEOPLASM OF LIVER, SECONDARY |
| 197.8 | SECONDARY MALIGNANT NEOPLASM OF OTHER DIGESTIVE ORGANS AND SPLEEN |
| 198.0 | SECONDARY MALIGNANT NEOPLASM OF KIDNEY |
| 198.1 | SECONDARY MALIGNANT NEOPLASM OF OTHER URINARY ORGANS |
| 198.2 | SECONDARY MALIGNANT NEOPLASM OF SKIN |
| 198.3 | SECONDARY MALIGNANT NEOPLASM OF BRAIN AND SPINAL CORD |
| 198.4 | SECONDARY MALIGNANT NEOPLASM OF OTHER PARTS OF NERVOUS SYSTEM |
| 198.5 | SECONDARY MALIGNANT NEOPLASM OF BONE AND BONE MARROW |
| 198.6 | SECONDARY MALIGNANT NEOPLASM OF OVARY |
| 198.7 | SECONDARY MALIGNANT NEOPLASM OF ADRENAL GLAND |
| 198.8 | SECONDARY MALIGNANT NEOPLASM OF OTHER SPECIFIED SITES |
| 198.82 | SECONDARY MALIGNANT NEOPLASM OF GENITAL ORGANS |
| 198.89 | SECONDARY MALIGNANT NEOPLASM OF OTHER SPECIFIED SITES |
| 199.0 | DISSEMINATED MALIGNANT NEOPLASM WITHOUT SPECIFICATION OF SITE |
| 199.1 | OTHER MALIGNANT NEOPLASM WITHOUT SPECIFICATION OF SITE |
| 233.0 | CARCINOMA IN SITU OF BREAST |
| C50 | MALIGNANT NEOPLASM OF BREAST |
| C50.0 | MALIGNANT NEOPLASM OF NIPPLE AND AREOLA |
| C50.01 | MALIGNANT NEOPLASM OF NIPPLE AND AREOLA, FEMALE |
| C50.011 | MALIGNANT NEOPLASM OF NIPPLE AND AREOLA, RIGHT FEMALE BREAST |
| C50.012 | MALIGNANT NEOPLASM OF NIPPLE AND AREOLA, LEFT FEMALE BREAST |
| C50.019 | MALIGNANT NEOPLASM OF NIPPLE AND AREOLA, UNSPECIFIED FEMALE BREAST |
| C50.02 | MALIGNANT NEOPLASM OF NIPPLE AND AREOLA, MALE |
| C50.021 | MALIGNANT NEOPLASM OF NIPPLE AND AREOLA, RIGHT MALE BREAST |
| C50.022 | MALIGNANT NEOPLASM OF NIPPLE AND AREOLA, LEFT MALE BREAST |
| C50.029 | MALIGNANT NEOPLASM OF NIPPLE AND AREOLA, UNSPECIFIED MALE BREAST |
| C50.1 | MALIGNANT NEOPLASM OF CENTRAL PORTION OF BREAST |
| C50.11 | MALIGNANT NEOPLASM OF CENTRAL PORTION OF BREAST, FEMALE |
| C50.111 | MALIGNANT NEOPLASM OF CENTRAL PORTION OF RIGHT FEMALE BREAST |
| C50.112 | MALIGNANT NEOPLASM OF CENTRAL PORTION OF LEFT FEMALE BREAST |
| C50.119 | MALIGNANT NEOPLASM OF CENTRAL PORTION OF UNSPECIFIED FEMALE BREAST |
| C50.12 | MALIGNANT NEOPLASM OF CENTRAL PORTION OF BREAST, MALE |
| C50.121 | MALIGNANT NEOPLASM OF CENTRAL PORTION OF RIGHT MALE BREAST |
| C50.122 | MALIGNANT NEOPLASM OF CENTRAL PORTION OF LEFT MALE BREAST |
| C50.129 | MALIGNANT NEOPLASM OF CENTRAL PORTION OF UNSPECIFIED MALE BREAST |
| C50.2 | MALIGNANT NEOPLASM OF UPPER-INNER QUADRANT OF BREAST |
| C50.21 | MALIGNANT NEOPLASM OF UPPER-INNER QUADRANT OF BREAST, FEMALE |
| C50.211 | MALIGNANT NEOPLASM OF UPPER-INNER QUADRANT OF RIGHT FEMALE BREAST |
| C50.212 | MALIGNANT NEOPLASM OF UPPER-INNER QUADRANT OF LEFT FEMALE BREAST |
| C50.219 | MALIGNANT NEOPLASM OF UPPER-INNER QUADRANT OF UNSPECIFIED FEMALE BREAST |
| C50.22 | MALIGNANT NEOPLASM OF UPPER-INNER QUADRANT OF BREAST, MALE |
| C50.221 | MALIGNANT NEOPLASM OF UPPER-INNER QUADRANT OF RIGHT MALE BREAST |
| C50.222 | MALIGNANT NEOPLASM OF UPPER-INNER QUADRANT OF LEFT MALE BREAST |
| C50.229 | MALIGNANT NEOPLASM OF UPPER-INNER QUADRANT OF UNSPECIFIED MALE BREAST |
| C50.3 | MALIGNANT NEOPLASM OF LOWER-INNER QUADRANT OF BREAST |
| C50.31 | MALIGNANT NEOPLASM OF LOWER-INNER QUADRANT OF BREAST, FEMALE |
| C50.311 | MALIGNANT NEOPLASM OF LOWER-INNER QUADRANT OF RIGHT FEMALE BREAST |
| C50.312 | MALIGNANT NEOPLASM OF LOWER-INNER QUADRANT OF LEFT FEMALE BREAST |
| C50.319 | MALIGNANT NEOPLASM OF LOWER-INNER QUADRANT OF UNSPECIFIED FEMALE BREAST |
| C50.32 | MALIGNANT NEOPLASM OF LOWER-INNER QUADRANT OF BREAST, MALE |
| C50.321 | MALIGNANT NEOPLASM OF LOWER-INNER QUADRANT OF RIGHT MALE BREAST |
| C50.322 | MALIGNANT NEOPLASM OF LOWER-INNER QUADRANT OF LEFT MALE BREAST |
| C50.329 | MALIGNANT NEOPLASM OF LOWER-INNER QUADRANT OF UNSPECIFIED MALE BREAST |
| C50.4 | MALIGNANT NEOPLASM OF UPPER-OUTER QUADRANT OF BREAST |
| C50.41 | MALIGNANT NEOPLASM OF UPPER-OUTER QUADRANT OF BREAST, FEMALE |
| C50.411 | MALIGNANT NEOPLASM OF UPPER-OUTER QUADRANT OF RIGHT FEMALE BREAST |
| C50.412 | MALIGNANT NEOPLASM OF UPPER-OUTER QUADRANT OF LEFT FEMALE BREAST |
| C50.419 | MALIGNANT NEOPLASM OF UPPER-OUTER QUADRANT OF UNSPECIFIED FEMALE BREAST |
| C50.42 | MALIGNANT NEOPLASM OF UPPER-OUTER QUADRANT OF BREAST, MALE |
| C50.421 | MALIGNANT NEOPLASM OF UPPER-OUTER QUADRANT OF RIGHT MALE BREAST |
| C50.422 | MALIGNANT NEOPLASM OF UPPER-OUTER QUADRANT OF LEFT MALE BREAST |
| C50.429 | MALIGNANT NEOPLASM OF UPPER-OUTER QUADRANT OF UNSPECIFIED MALE BREAST |
| C50.5 | MALIGNANT NEOPLASM OF LOWER-OUTER QUADRANT OF BREAST |
| C50.51 | MALIGNANT NEOPLASM OF LOWER-OUTER QUADRANT OF BREAST, FEMALE |
| C50.511 | MALIGNANT NEOPLASM OF LOWER-OUTER QUADRANT OF RIGHT FEMALE BREAST |
| C50.512 | MALIGNANT NEOPLASM OF LOWER-OUTER QUADRANT OF LEFT FEMALE BREAST |
| C50.519 | MALIGNANT NEOPLASM OF LOWER-OUTER QUADRANT OF UNSPECIFIED FEMALE BREAST |
| C50.52 | MALIGNANT NEOPLASM OF LOWER-OUTER QUADRANT OF BREAST, MALE |
| C50.521 | MALIGNANT NEOPLASM OF LOWER-OUTER QUADRANT OF RIGHT MALE BREAST |
| C50.522 | MALIGNANT NEOPLASM OF LOWER-OUTER QUADRANT OF LEFT MALE BREAST |
| C50.529 | MALIGNANT NEOPLASM OF LOWER-OUTER QUADRANT OF UNSPECIFIED MALE BREAST |
| C50.6 | MALIGNANT NEOPLASM OF AXILLARY TAIL OF BREAST |
| C50.61 | MALIGNANT NEOPLASM OF AXILLARY TAIL OF BREAST, FEMALE |
| C50.611 | MALIGNANT NEOPLASM OF AXILLARY TAIL OF RIGHT FEMALE BREAST |
| C50.612 | MALIGNANT NEOPLASM OF AXILLARY TAIL OF LEFT FEMALE BREAST |
| C50.619 | MALIGNANT NEOPLASM OF AXILLARY TAIL OF UNSPECIFIED FEMALE BREAST |
| C50.62 | MALIGNANT NEOPLASM OF AXILLARY TAIL OF BREAST, MALE |
| C50.621 | MALIGNANT NEOPLASM OF AXILLARY TAIL OF RIGHT MALE BREAST |
| C50.622 | MALIGNANT NEOPLASM OF AXILLARY TAIL OF LEFT MALE BREAST |
| C50.629 | MALIGNANT NEOPLASM OF AXILLARY TAIL OF UNSPECIFIED MALE BREAST |
| C50.8 | MALIGNANT NEOPLASM OF OVERLAPPING SITES OF BREAST |
| C50.81 | MALIGNANT NEOPLASM OF OVERLAPPING SITES OF BREAST, FEMALE |
| C50.811 | MALIGNANT NEOPLASM OF OVERLAPPING SITES OF RIGHT FEMALE BREAST |
| C50.812 | MALIGNANT NEOPLASM OF OVERLAPPING SITES OF LEFT FEMALE BREAST |
| C50.819 | MALIGNANT NEOPLASM OF OVERLAPPING SITES OF UNSPECIFIED FEMALE BREAST |
| C50.82 | MALIGNANT NEOPLASM OF OVERLAPPING SITES OF BREAST, MALE |
| C50.821 | MALIGNANT NEOPLASM OF OVERLAPPING SITES OF RIGHT MALE BREAST |
| C50.822 | MALIGNANT NEOPLASM OF OVERLAPPING SITES OF LEFT MALE BREAST |
| C50.829 | MALIGNANT NEOPLASM OF OVERLAPPING SITES OF UNSPECIFIED MALE BREAST |
| C50.9 | MALIGNANT NEOPLASM OF BREAST OF UNSPECIFIED SITE |
| C50.91 | MALIGNANT NEOPLASM OF BREAST OF UNSPECIFIED SITE, FEMALE |
| C50.911 | MALIGNANT NEOPLASM OF UNSPECIFIED SITE OF RIGHT FEMALE BREAST |
| C50.912 | MALIGNANT NEOPLASM OF UNSPECIFIED SITE OF LEFT FEMALE BREAST |
| C50.919 | MALIGNANT NEOPLASM OF UNSPECIFIED SITE OF UNSPECIFIED FEMALE BREAST |
| C50.92 | MALIGNANT NEOPLASM OF BREAST OF UNSPECIFIED SITE, MALE |
| C50.921 | MALIGNANT NEOPLASM OF UNSPECIFIED SITE OF RIGHT MALE BREAST |
| C50.922 | MALIGNANT NEOPLASM OF UNSPECIFIED SITE OF LEFT MALE BREAST |
| C50.929 | MALIGNANT NEOPLASM OF UNSPECIFIED SITE OF UNSPECIFIED MALE BREAST |
| C77.0 | SECONDARY AND UNSPECIFIED MALIGNANT NEOPLASM OF LYMPH NODES OF HEAD, FACE AND NECK |
| C77.1 | SECONDARY AND UNSPECIFIED MALIGNANT NEOPLASM OF INTRATHORACIC LYMPH NODES |
| C77.2 | SECONDARY AND UNSPECIFIED MALIGNANT NEOPLASM OF INTRA-ABDOMINAL LYMPH NODES |
| C77.3 | SECONDARY AND UNSPECIFIED MALIGNANT NEOPLASM OF AXILLA AND UPPER LIMB LYMPH NODES |
| C77.4 | SECONDARY AND UNSPECIFIED MALIGNANT NEOPLASM OF INGUINAL AND LOWER LIMB LYMPH NODES |
| C77.5 | SECONDARY AND UNSPECIFIED MALIGNANT NEOPLASM OF INTRAPELVIC LYMPH NODES |
| C77.8 | SECONDARY AND UNSPECIFIED MALIGNANT NEOPLASM OF LYMPH NODES OF MULTIPLE REGIONS |
| C77.9 | SECONDARY AND UNSPECIFIED MALIGNANT NEOPLASM OF LYMPH NODE, UNSPECIFIED |
| C78 | SECONDARY MALIGNANT NEOPLASM OF RESPIRATORY AND DIGESTIVE ORGANS |
| C78.0 | SECONDARY MALIGNANT NEOPLASM OF LUNG |
| C78.00 | SECONDARY MALIGNANT NEOPLASM OF UNSPECIFIED LUNG |
| C78.01 | SECONDARY MALIGNANT NEOPLASM OF RIGHT LUNG |
| C78.02 | SECONDARY MALIGNANT NEOPLASM OF LEFT LUNG |
| C78.1 | SECONDARY MALIGNANT NEOPLASM OF MEDIASTINUM |
| C78.2 | SECONDARY MALIGNANT NEOPLASM OF PLEURA |
| C78.3 | SECONDARY MALIGNANT NEOPLASM OF OTHER AND UNSPECIFIED RESPIRATORY ORGANS |
| C78.30 | SECONDARY MALIGNANT NEOPLASM OF UNSPECIFIED RESPIRATORY ORGAN |
| C78.39 | SECONDARY MALIGNANT NEOPLASM OF OTHER RESPIRATORY ORGANS |
| C78.4 | SECONDARY MALIGNANT NEOPLASM OF SMALL INTESTINE |
| C78.5 | SECONDARY MALIGNANT NEOPLASM OF LARGE INTESTINE AND RECTUM |
| C78.6 | SECONDARY MALIGNANT NEOPLASM OF RETROPERITONEUM AND PERITONEUM |
| C78.7 | SECONDARY MALIGNANT NEOPLASM OF LIVER AND INTRAHEPATIC BILE DUCT |
| C78.8 | SECONDARY MALIGNANT NEOPLASM OF OTHER AND UNSPECIFIED DIGESTIVE ORGANS |
| C78.80 | SECONDARY MALIGNANT NEOPLASM OF UNSPECIFIED DIGESTIVE ORGAN |
| C78.89 | SECONDARY MALIGNANT NEOPLASM OF OTHER DIGESTIVE ORGANS |
| C79.0 | SECONDARY MALIGNANT NEOPLASM OF KIDNEY AND RENAL PELVIS |
| C79.00 | SECONDARY MALIGNANT NEOPLASM OF UNSPECIFIED KIDNEY AND RENAL PELVIS |
| C79.01 | SECONDARY MALIGNANT NEOPLASM OF RIGHT KIDNEY AND RENAL PELVIS |
| C79.02 | SECONDARY MALIGNANT NEOPLASM OF LEFT KIDNEY AND RENAL PELVIS |
| C79.1 | SECONDARY MALIGNANT NEOPLASM OF BLADDER AND OTHER AND UNSPECIFIED URINARY ORGANS |
| C79.10 | SECONDARY MALIGNANT NEOPLASM OF UNSPECIFIED URINARY ORGANS |
| C79.11 | SECONDARY MALIGNANT NEOPLASM OF BLADDER |
| C79.19 | SECONDARY MALIGNANT NEOPLASM OF OTHER URINARY ORGANS |
| C79.2 | SECONDARY MALIGNANT NEOPLASM OF SKIN |
| C79.31 | SECONDARY MALIGNANT NEOPLASM OF BRAIN |
| C79.32 | SECONDARY MALIGNANT NEOPLASM OF CEREBRAL MENINGES |
| C79.4 | SECONDARY MALIGNANT NEOPLASM OF OTHER AND UNSPECIFIED PARTS OF NERVOUS SYSTEM |
| C79.40 | SECONDARY MALIGNANT NEOPLASM OF UNSPECIFIED PART OF NERVOUS SYSTEM |
| C79.49 | SECONDARY MALIGNANT NEOPLASM OF OTHER PARTS OF NERVOUS SYSTEM |
| C79.5 | SECONDARY MALIGNANT NEOPLASM OF BONE AND BONE MARROW |
| C79.51 | SECONDARY MALIGNANT NEOPLASM OF BONE |
| C79.52 | SECONDARY MALIGNANT NEOPLASM OF BONE MARROW |
| C79.6 | SECONDARY MALIGNANT NEOPLASM OF OVARY |
| C79.60 | SECONDARY MALIGNANT NEOPLASM OF UNSPECIFIED OVARY |
| C79.61 | SECONDARY MALIGNANT NEOPLASM OF RIGHT OVARY |
| C79.62 | SECONDARY MALIGNANT NEOPLASM OF LEFT OVARY |
| C79.7 | SECONDARY MALIGNANT NEOPLASM OF ADRENAL GLAND |
| C79.70 | SECONDARY MALIGNANT NEOPLASM OF UNSPECIFIED ADRENAL GLAND |
| C79.71 | SECONDARY MALIGNANT NEOPLASM OF RIGHT ADRENAL GLAND |
| C79.72 | SECONDARY MALIGNANT NEOPLASM OF LEFT ADRENAL GLAND |
| C79.82 | SECONDARY MALIGNANT NEOPLASM OF GENITAL ORGANS |
| C79.89 | SECONDARY MALIGNANT NEOPLASM OF OTHER SPECIFIED SITES |
| C79.9 | SECONDARY MALIGNANT NEOPLASM OF UNSPECIFIED SITE |
| C80.0 | DISSEMINATED MALIGNANT NEOPLASM, UNSPECIFIED |
| C80.1 | MALIGNANT (PRIMARY) NEOPLASM, UNSPECIFIED |
| D05 | CARCINOMA IN SITU OF BREAST |
| D05.0 | LOBULAR CARCINOMA IN SITU OF BREAST |
| D05.00 | LOBULAR CARCINOMA IN SITU OF UNSPECIFIED BREAST |
| D05.01 | LOBULAR CARCINOMA IN SITU OF RIGHT BREAST |
| D05.02 | LOBULAR CARCINOMA IN SITU OF LEFT BREAST |
| D05.1 | INTRADUCTAL CARCINOMA IN SITU OF BREAST |
| D05.10 | INTRADUCTAL CARCINOMA IN SITU OF UNSPECIFIED BREAST |
| D05.11 | INTRADUCTAL CARCINOMA IN SITU OF RIGHT BREAST |
| D05.12 | INTRADUCTAL CARCINOMA IN SITU OF LEFT BREAST |
| D05.8 | OTHER SPECIFIED TYPE OF CARCINOMA IN SITU OF BREAST |
| D05.80 | OTHER SPECIFIED TYPE OF CARCINOMA IN SITU OF UNSPECIFIED BREAST |
| D05.81 | OTHER SPECIFIED TYPE OF CARCINOMA IN SITU OF RIGHT BREAST |
| D05.82 | OTHER SPECIFIED TYPE OF CARCINOMA IN SITU OF LEFT BREAST |
| D05.9 | UNSPECIFIED TYPE OF CARCINOMA IN SITU OF BREAST |
| D05.90 | UNSPECIFIED TYPE OF CARCINOMA IN SITU OF UNSPECIFIED BREAST |
| D05.91 | UNSPECIFIED TYPE OF CARCINOMA IN SITU OF RIGHT BREAST |
| D05.92 | UNSPECIFIED TYPE OF CARCINOMA IN SITU OF LEFT BREAST |
| V10.3 | PERSONAL HISTORY OF MALIGNANT NEOPLASM OF BREAST |
| V45.71 | ACQUIRED ABSENCE OF BREAST AND NIPPLE |
| V86 | ESTROGEN RECEPTOR STATUS |
| V86.0 | ESTROGEN RECEPTOR POSITIVE STATUS [ER+] |
| V86.1 | ESTROGEN RECEPTOR NEGATIVE STATUS [ER-] |
| Z17.0 | ESTROGEN RECEPTOR POSITIVE STATUS [ER+] |
| Z17.1 | ESTROGEN RECEPTOR NEGATIVE STATUS [ER-] |
| Z85.3 | PERSONAL HISTORY OF MALIGNANT NEOPLASM OF BREAST |
| Z90.1 | ACQUIRED ABSENCE OF BREAST AND NIPPLE |
| Z90.10 | ACQUIRED ABSENCE OF UNSPECIFIED BREAST AND NIPPLE |
| Z90.11 | ACQUIRED ABSENCE OF RIGHT BREAST AND NIPPLE |
| Z90.12 | ACQUIRED ABSENCE OF LEFT BREAST AND NIPPLE |
| Z90.13 | ACQUIRED ABSENCE OF BILATERAL BREASTS AND NIPPLES |

ICD: International Classification of Diseases.
